# Supplementary material for: Facile synthesis of high-quality CuInZnxS2+x core/shell nanocrystals and their application for detection of C-reactive protein
Source: Royal Society of Chemistry journal article supplement (doi:10.1039/c2jm33763k), 2012-01-01
Supplement: c2jm33763k.pdf [file c2jm33763k.pdf]

# Facile Synthesis of High-quality $\text{CuInZn}_x\text{S}_{2+x}$ Core/Shell Nanocrystals and Their Application for Detection of C-Reactive Protein

*Huaibin Shen<sup>1</sup>, Hang Yuan<sup>2</sup>, Feng Wu<sup>2</sup>, Xianwei Bai<sup>1</sup>, Changhua  
Zhou<sup>1</sup>, Hongzhe Wang<sup>1</sup>, Tikang Lu,<sup>3</sup> Zhifeng Qin<sup>3</sup>, Lan Ma<sup>2\*</sup>, and  
Lin Song Li<sup>1\*</sup>*

<sup>1</sup>Key Laboratory for Special Functional Materials, Henan University, Kaifeng  
475004, P. R. China;

<sup>2</sup>Life Science & Health Division, Graduate School at Shenzhen, Tsinghua  
University, Shenzhen, 518055, P.R. China

<sup>3</sup> Shenzhen Entry-Exit Inspection and Quarantine Bureau of the People's  
Republic of China (SZCIQ)., Shenzhen, 518045, P.R. China

E-mail: lsli@henu.edu.cn, malan@sz.tsinghua.edu.cn

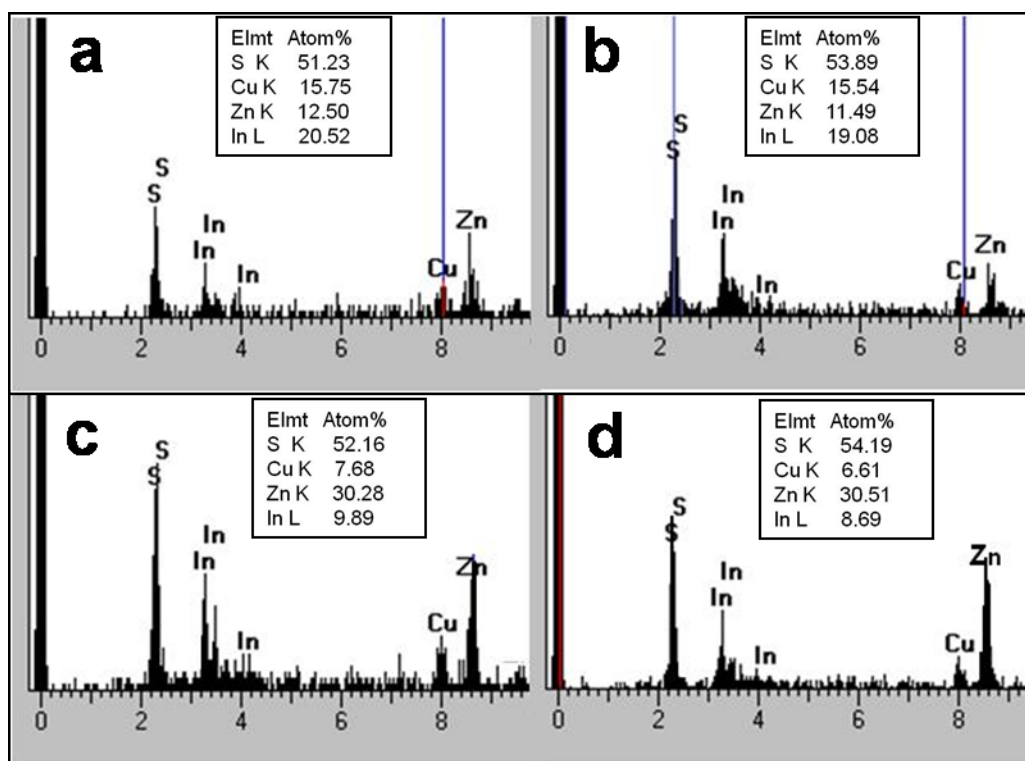

**Figure S1.** EDX spectra of CuInZn<sub>x</sub>S<sub>2+x</sub> (x=0.6) cores (a-b) and CuInZn<sub>x</sub>S<sub>2+x</sub>/ZnS core/shell nanocrystals (c-d).
